# Supplementary material for: Genome-Wide Analysis Reveals the Vacuolar pH-Stat of Saccharomyces cerevisiae
Source: PubMed Central journal article supplement (PMC3056714; doi:10.1371/journal.pone.0017619), 2011-03-14

Figure S1

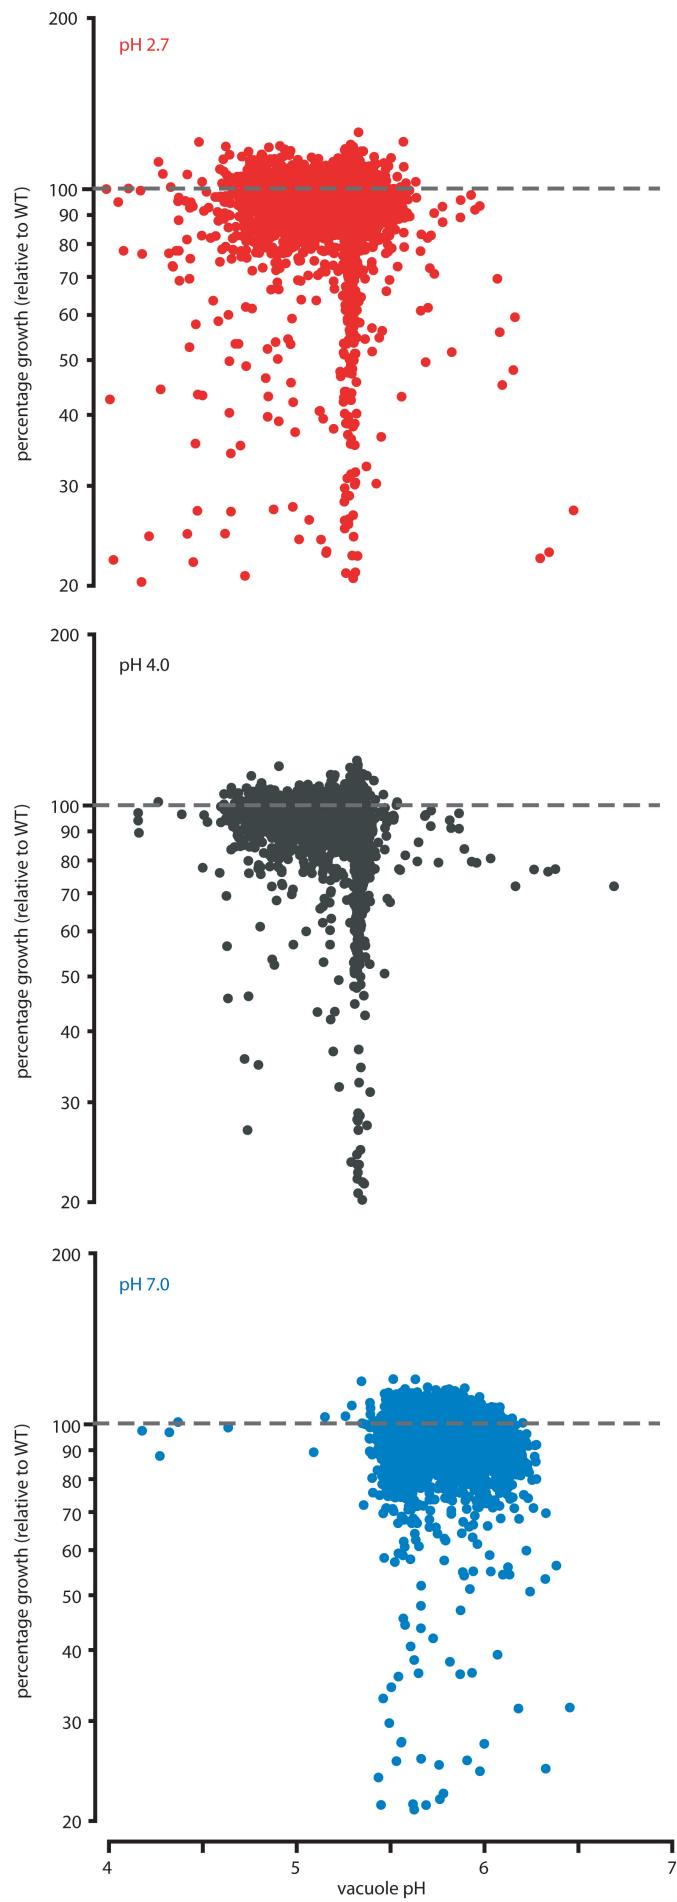

Supplement: pone.0017619.s001.pdf [file pone.0017619.s001.pdf]
