# Supplementary material for: Genome-Wide Analysis Reveals the Vacuolar pH-Stat of Saccharomyces cerevisiae
Source: PubMed Central journal article supplement (PMC3056714; doi:10.1371/journal.pone.0017619), 2011-03-14
Supplement: pone.0017619.s005.pdf [file pone.0017619.s005.pdf]

Table S3. Gene deletions that cause defects in vacuole pH homeostasis in response to more than one external pH

| ORF                                                        | gene name | cellular location         | function                                                                                                               |
|------------------------------------------------------------|-----------|---------------------------|------------------------------------------------------------------------------------------------------------------------|
| <b>A. Gene deletions that increase vacuole pH (n = 30)</b> |           |                           |                                                                                                                        |
| <i>V-type H<sup>+</sup>-ATPase</i>                         |           |                           |                                                                                                                        |
| YDL185W                                                    | VMA1**    | vacuole, endocytic system | luminal acidification                                                                                                  |
| YEL027W                                                    | VMA3      | vacuole, endocytic system | subunit A of the peripheral catalytic V1 sector                                                                        |
| YOR332W                                                    | VMA4      | vacuole, endocytic system | subunit c of the integral membrane V0 sector                                                                           |
| YKL080W                                                    | VMA5      | vacuole, endocytic system | subunit E of V1                                                                                                        |
| YGR020C                                                    | VMA7**    | vacuole, endocytic system | subunit C of V1                                                                                                        |
| YCL005W                                                    | VMA9      | vacuole, endocytic system | subunit F of V1                                                                                                        |
| YHR039C                                                    | VMA10     | vacuole, endocytic system | subunit e of V0                                                                                                        |
| YPL234C                                                    | VMA11     | vacuole, endocytic system | subunit G of V1                                                                                                        |
| YKL119C                                                    | VMA12     | endoplasmic reticulum     | subunit c' of V0                                                                                                       |
| YHR060W                                                    | VMA22*    | endoplasmic reticulum     | V-ATPase assembly                                                                                                      |
| YMR123W                                                    | PKR1**    | endoplasmic reticulum     | V-ATPase assembly                                                                                                      |
| <i>Sterol/lipid biosynthesis</i>                           |           |                           |                                                                                                                        |
| YGL012W                                                    | ERG4      | endoplasmic reticulum     | C-24(28) sterol reductase                                                                                              |
| YML008C                                                    | ERG6      | endoplasmic reticulum     | delta(24)-sterol C-methyltransferase                                                                                   |
| YGR037C                                                    | ACB1      | cytoplasm, nucleus        | acyl-CoA binding protein, ceramide biogenesis                                                                          |
| <i>Membrane trafficking</i>                                |           |                           |                                                                                                                        |
| YHR012W                                                    | VPS29     | endosome                  | retromer complex, anterograde endocytic trafficking                                                                    |
| YOR132W                                                    | VPS17     | endosome                  | retromer complex, anterograde endocytic trafficking                                                                    |
| YOR069W                                                    | VPS5*     | endosome                  | retromer complex, anterograde endocytic trafficking                                                                    |
| YPL195W                                                    | APL5      | Golgi-vacuole vesicles    | delta-subunit of the AP-3 coat complex, Golgi to vacuole membrane trafficking                                          |
| YHR108W                                                    | GGA2      | Golgi                     | gamma-adaptin ortholog, Golgi to endosome protein sorting                                                              |
| <i>Post-translational protein modification</i>             |           |                           |                                                                                                                        |
| YOR002W                                                    | ALG6      | endoplasmic reticulum     | alpha-1,3-glucosyltransferase, mutations in human orthologs are linked to congenital disorder of glycosylation type Ic |
| YPL227C                                                    | ALG5      | endoplasmic reticulum     | UDP-glucose:dolichyl-phosphate glucosyltransferase                                                                     |
| YAL023C                                                    | PMT2      | endoplasmic reticulum     | protein O-mannosyltransferase                                                                                          |
| <i>Cell signaling</i>                                      |           |                           |                                                                                                                        |
| YPL176C                                                    | TRE1      | plasma membrane           | transferrin receptor-like, regulates the vacuole degradation of the metal transporter Smf1, an Nramp ortholog          |
| YHR075C                                                    | PPE1      | cytoplasm                 | phosphoprotein phosphatase 2A methyl esterase                                                                          |
| YNL307C                                                    | MCK1/YPK1 | cytoplasm                 | glycogen synthase kinase (GSK-3) ortholog                                                                              |
| YDR195W                                                    | REF2      | nucleus                   | mRNA/snoRNA processing, important for ion homeostasis                                                                  |
| <i>Other</i>                                               |           |                           |                                                                                                                        |
| YLR131C                                                    | ACE2      | cytoplasm, nucleus        | transcription factor, activates expression of early G1 genes including CUP1, or metallothionein                        |
| YCL016C                                                    | DCC1      | nucleus                   | sister chromatid cohesion                                                                                              |
| YOL072W                                                    | THP1      | nucleus                   | nuclear pore-associated protein, mRNA export                                                                           |
| <b>B. Gene deletions that decrease vacuole pH (n = 77)</b> |           |                           |                                                                                                                        |
| <i>F<sub>1</sub>F<sub>o</sub> ATP-synthase</i>             |           |                           |                                                                                                                        |
| YPL078C                                                    | ATP4      | mitochondrion             | H <sup>+</sup> -coupled ATP synthesis                                                                                  |
| YLR295C                                                    | ATP14     | mitochondrion             | b subunit of the stator stalk                                                                                          |
| YGR008C                                                    | STF2      | mitochondrion             | h subunit of the F <sub>o</sub> sector                                                                                 |
|                                                            |           |                           | regulator of the F <sub>1</sub> F <sub>0</sub> -ATP synthase                                                           |
| <i>Sterol/lipid biosynthesis</i>                           |           |                           |                                                                                                                        |
| YGR007W                                                    | MUQ1      | cytoplasm, nucleus        | choline phosphate cytidyltransferase, PE biosynthesis                                                                  |
| YPL057C                                                    | SUR1/CSG1 | intracellular             | mannosylinositol phosphorylceramide (MIPC) synthase subunit, sphingolipid biosynthesis                                 |
| YHL007C                                                    | STE20     | cytoplasm, bud            | PAK family kinase, negatively regulates sterol levels                                                                  |
| <i>Membrane trafficking</i>                                |           |                           |                                                                                                                        |
| YPL084W                                                    | BRO1      | endosome                  | coordinates deubiquitination in the MVB pathway                                                                        |
| YPR173C                                                    | VPS4      | endosome, cytoplasm       | AAA-type ATPase, catalyze disassembly of MVB protein Machinery                                                         |
| YPL002C                                                    | VPS22***  | endosome                  | subunit of the ESCRT-II complex, protein sortin into lumen vesicles in the MVB pathway                                 |

|                                                     |           |                             |                                                                                                      |
|-----------------------------------------------------|-----------|-----------------------------|------------------------------------------------------------------------------------------------------|
| YML001W                                             | YPT7      | vacuole                     | Rab-GTP binding protein, vacuole membrane fusion, trafficking and inheritance                        |
| YPL045W                                             | VPS16***  | vacuole, endosome           | subunit of Vps-C complexes, vacuole fusion and endosome-vacuole trafficking                          |
| YIL076W                                             | SEC28     | Golgi-ER vesicles, endosome | epsilon-subunit of the AP-1 coat complex, Golgi-ER trafficking, mutant shows defective MVB formation |
| YPL051W                                             | ARL3      | Golgi                       | Ras GTPase, intra-Golgi vesicle trafficking                                                          |
| <i>Post-translational protein modification</i>      |           |                             |                                                                                                      |
| YGL257C                                             | MNT2      | Golgi                       | mannosyltransferase                                                                                  |
| YPL053C                                             | KTR6      | membrane, Golgi?            | Probable mannosylphosphate transferase, oligosaccharide biosynthesis                                 |
| YJL184W                                             | GON7      | nucleus                     | EKC/KEOPS protein complex subunit, modification of N-linked oligosaccharides                         |
| YPL069C                                             | BTS1      | mitochondrion               | geranylgeranyl diphosphate synthase, required for Rab-GTP binding protein function                   |
| <i>Cell signaling</i>                               |           |                             |                                                                                                      |
| YPL031C                                             | PHO85     | nucleus                     | cyclin-dependent kinase involved in global response to stress                                        |
| YOR014W                                             | RTS1      | cytoplasm, nucleus          | B-type regulatory subunit of protein phosphatase 2A                                                  |
| <i>Transporters</i>                                 |           |                             |                                                                                                      |
| YFL011W                                             | HXT10     | plasma membrane             | putative hexose transporter                                                                          |
| YPL058C                                             | PDR12     | plasma membrane             | ATP-binding cassette transporter, contributes to organic acid adaptation by transport                |
| YPL060W                                             | LPE10     | mitochondrion               | magnesium transporter, MIT superfamily                                                               |
| <i>Protein degradation</i>                          |           |                             |                                                                                                      |
| YPL003W                                             | ULA1      | unknown                     | protein degradation through neddylation                                                              |
| YGR003W                                             | CUL3      | cytoplasm, nucleus          | cullin-based E3 ubiquitin-protein ligase, activated by neddylation for protein degradation           |
| <i>Transcriptional and translational regulation</i> |           |                             |                                                                                                      |
| YPL064C                                             | CWC27     | spliceosome                 | pre-mRNA splicing                                                                                    |
| YPL029W                                             | SUV3      | mitochondrion               | ATP-dependent RNA helicase, degradation of aberrant or unprocessed RNAs                              |
| YPR189W                                             | SKI3      | cytoplasm, nucleus          | exosome mediated mRNA degradation, translation inhibition                                            |
| YPL086C                                             | ELP3      | cytoplasm, nucleus          | elongator complex subunit, chromatin remodeling                                                      |
| YPR179C                                             | HDA3      | nucleus                     | class II histone deacetylase complex subunit                                                         |
| YDR191W                                             | HST4      | nucleus, cytoplasm          | Sir2-family NAD <sup>+</sup> -dependent protein deacetylase                                          |
| YPL001W                                             | HAT1      | nucleus, cytoplasm          | catalytic subunit of a histone acetyltransferase complex                                             |
| YGL244W                                             | RTF1      | nucleus                     | RNA polymerase II-associated complex subunit, transcriptional regulation                             |
| YPL038W                                             | MET31     | cytoplasm, nucleus          | zinc-finger DNA-binding protein, transcriptional regulation                                          |
| YPL089C                                             | RLM1***   | nucleus                     | MADS-box transcription factor, activated by MAPK                                                     |
| YBR267W                                             | REI1      | cytoplasm, nucleus          | pre-60S factor, ribosomal biogenesis                                                                 |
| YPR132W                                             | RPS23B    | ribosome                    | ribosomal protein 28 of the 40S subunit, translational accuracy                                      |
| YPR163C                                             | TIF3***   | ribosome                    | translation initiation factor eIF-4B, binds RNA                                                      |
| YPL037C                                             | EGD1      | cytoplasm, nucleus          | beta-subunit of the nascent polypeptide-associated complex, protein targeting                        |
| YPL079W                                             | RPL21B*   | ribosome                    | component of the large 60S ribosomal subunit                                                         |
| YNL177C                                             | MRPL22*** | ribosome                    | component of the mitochondrial large ribosomal subunit                                               |
| YKR006C                                             | MRPL13    | ribosome                    | component of the mitochondrial large ribosomal subunit                                               |
| YLR312W-A                                           | MRPL15    | ribosome                    | component of the mitochondrial large ribosomal subunit                                               |
| YPL013C                                             | MRPS16    | ribosome                    | component of the mitochondrial small ribosomal subunit                                               |
| YPR166C                                             | MRP2      | ribosome                    | component of the mitochondrial small ribosomal subunit                                               |
| <i>Metabolism</i>                                   |           |                             |                                                                                                      |
| YPR167C                                             | MET16     | cytoplasm                   | 3'-phosphoadenylylsulfate reductase, methionine metabolism                                           |
| YBR248C                                             | HIS7      | cytoplasm                   | glutamine amidotransferase, histidine biosynthesis                                                   |
| YPR145W                                             | ASN1      | cytoplasm                   | asparagine synthetase, asparagine biosynthesis                                                       |
| YER061C                                             | CEM1      | mitochondrion               | beta-keto-acyl synthase, fatty acid synthesis                                                        |
| YEL029C                                             | BUD16     | cytoplasm, nucleus          | putative pyridoxal kinase, vitamin B6 metabolism                                                     |
| YCR105W                                             | ADH7      | cytoplasm                   | cinnamyl alcohol dehydrogenase ortholog, fusel alcohol synthesis                                     |
| YPL061W                                             | ADH6      | cytoplasm                   | aldehyde dehydrogenase, converts acetaldehyde to acetate                                             |
| <i>Other</i>                                        |           |                             |                                                                                                      |
| YPL024W                                             | RMI1      | cytoplasm, nucleus          | subunit of the RecQ helicase-Topo III complex                                                        |
| YPL059W                                             | GRX5      | mitochondrion               | oxidoreductase involved in synthesis of iron-sulfur centers,                                         |

|                         |       |                     |                                                                         |
|-------------------------|-------|---------------------|-------------------------------------------------------------------------|
| YPR200C                 | ARR2  | unknown             | electron transport<br>arsenate reductase, converts arsenate to arsenite |
| <i>Unknown function</i> |       |                     |                                                                         |
| YDR068W                 | DOS2  | cytoplasm           |                                                                         |
| YDR152W                 | GIR2  | cytoplasm           | highly-acidic RWD-domain containing protein                             |
| YDR525W-A <sup>a</sup>  | SNA2  | vesicles            | two predicted TMDs, orthologous to PMP3 encoding a cation transporter   |
| YDR540C                 | IRC4  | cytoplasm, nucleus  |                                                                         |
| YFR012W <sup>a</sup>    |       | membrane?           | four predicted TMDs                                                     |
| YGR015C                 |       | mitochondrion?      |                                                                         |
| YGR021W                 |       | mitochondrion?      |                                                                         |
| YGL260W                 |       | unknown             | neighbors PAU11                                                         |
| YGL261C                 | PAU11 | membrane?           |                                                                         |
| YGL263W <sup>a</sup>    | COS12 | membrane?           | two tandem repeats each with one predicted TMD                          |
| YMR073C                 | IRC21 | cytoplasm           | putative cytochrome oxidoreductase                                      |
| YPL021W                 | ECM23 | nucleus             | negative regulator of transcription?                                    |
| YPL030W                 | TRM44 | cytoplasm           | putative tRNA U44 2'-O-methyltransferase, neighbors PHO85               |
| YPL054W                 | LEE1  | unknown             | zinc-finger protein                                                     |
| YPL055C                 | LGE1  | nucleus             | mutant forms abnormally large cells                                     |
| YPL056C                 | LCL1  | unknown             | neighbors LGE1                                                          |
| YPL066W                 |       | cytoplasm, bud      |                                                                         |
| YPL071C                 |       | cytoplasm, nucleus? | located near BTS1                                                       |
| YPL077C                 |       | unknown             | neighbors ATP4                                                          |
| YPR116W                 |       | mitochondrion       |                                                                         |
| YPR153W <sup>a</sup>    |       | unknown             | three predicted TMDs                                                    |
| YPR157W                 | TDA6  | unknown             | neighbors CUR1                                                          |
| YPR158W                 | CUR1  | nucleus?            | destabilizes [URE3] priors, BTN2 paralog                                |

All gene deletions listed showed vacuole pH defects under more than one external pH.

\* A second strain harboring an overlapping genomic deletion eliminated this ORF and also displayed this phenotype.

\*\* Mutant did not grow under alkaline conditions.

\*\*\* Mutant did not grow under acidic conditions.

<sup>a</sup> Predicted membrane spans, potential transporter
